# Supplementary material
Source: bioRxiv or medRxiv preprint supplement (https://www.biorxiv.org/highwire/filestream/21074/field_highwire_adjunct_files/0/076232-1.pdf)
Supplement: Supplementary file [file 076232-1.pdf]

# The Melting Snowball: A Test of the Snowball Model Using RNA

**Ata Kalirad\*** and **Ricardo B. R. Azevedo\***

\*Department of Biology and Biochemistry, University of Houston,, Houston, Texas, United States of America

---

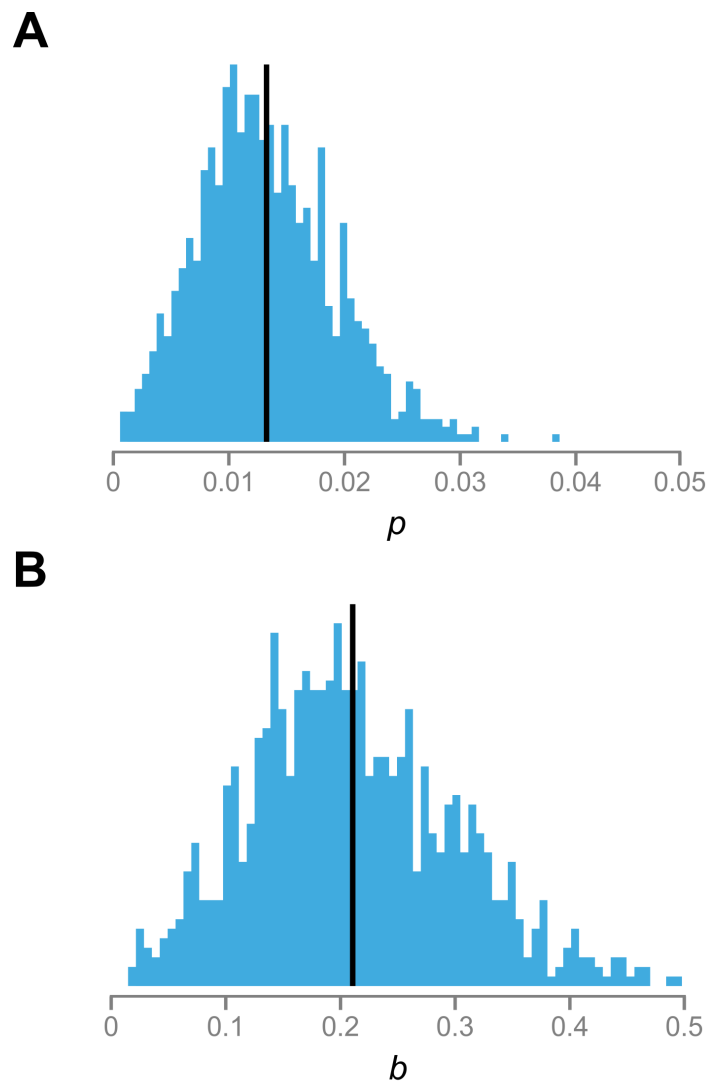

**Figure S1** Distributions of the parameters of the snowball and linear models in the RNA folding simulations. (A) Probability,  $p$ , that a simple DMI appears in the snowball model. (B) Rate of accumulation,  $b$ , of simple DMIs in the linear model. For each of the  $10^3$  stochastic RNA folding simulations we estimated  $p$  and  $b$  by fitting the models in Equations 2 and 6, respectively, by the method of least squares. The solid black lines indicate the means of the distributions:  $\bar{p} = 0.013$  and  $\bar{b} = 0.211$ .

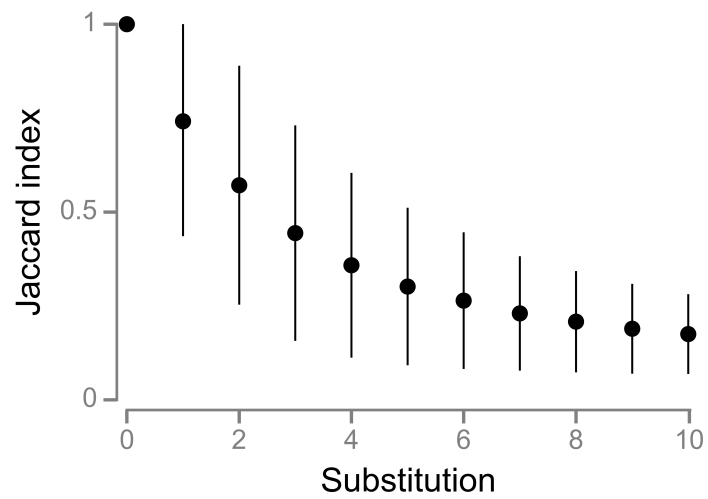

**Figure S2** Networks of potential simple DMIs are not static in the RNA folding model. Jaccard index (Equation 5) of the DMI networks of each descendant lineage after  $k$  substitutions compared to its ancestor. Values are means of  $2 \times 10^3$  DMI networks ( $10^3$  simulations, 2 lineages per simulation). Based on the simulations summarized in Figure 5. Error bars show  $\pm 1$  standard deviation.

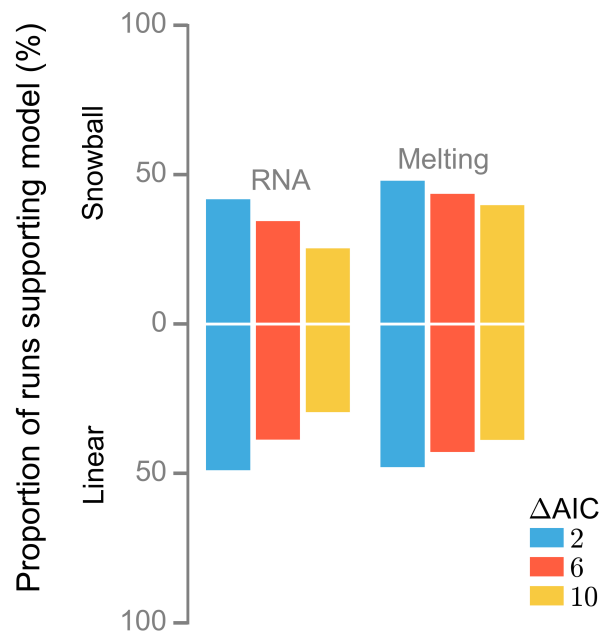

**Figure S3** The RNA folding model behaves as expected under the melting snowball model. We fitted the snowball model and a linear model to each run from two kinds of simulations: simulations of the RNA folding model, and direct simulations of the melting snowball process with values of  $p$  and  $q$  estimated directly from each RNA folding simulation (Figure 8). Bars above (below) the  $x$ -axis show the proportions of runs providing stronger support for the snowball (linear) model; the proportions of runs providing approximately equal support for both models are not shown. Each proportion is based on  $10^3$  stochastic simulations. Different colors indicate the  $\Delta AIC$  thresholds used in evaluating the level of support for the two models.

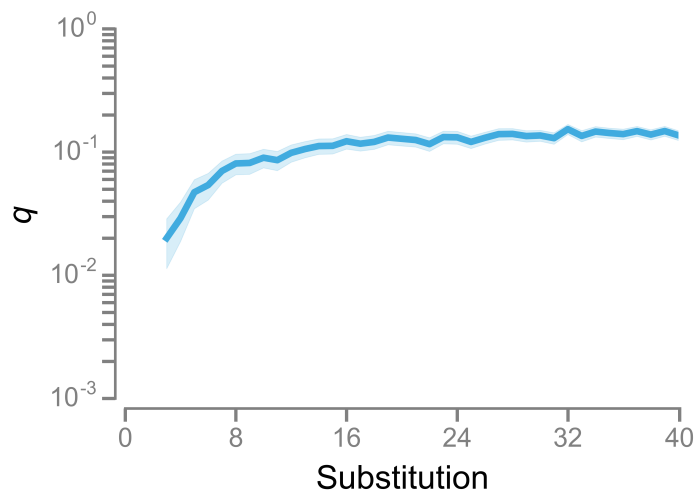

**Figure S4** Evolution of the probability,  $q$ , that a simple DMI becomes complex. For each stochastic RNA folding simulation we measured  $q_k$ , the probability that a simple DMI present after  $k$  substitutions will become complex after the next substitution. Values are means of  $10^3$  simulations at each  $k$ . Based on the simulations summarized in Figure 5. Shaded regions indicate 95% CIs.

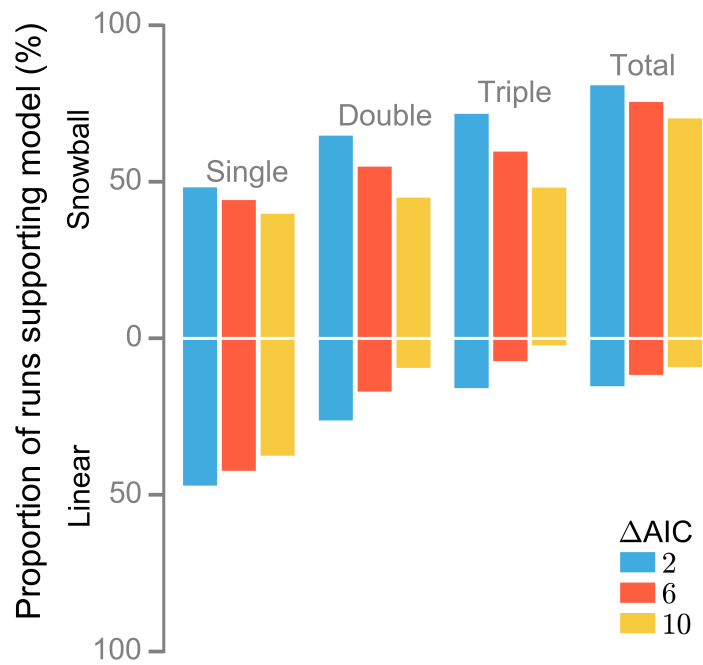

**Figure S5** Complex DMIs snowball in the RNA folding model. We fitted two models to the evolutionary responses in the numbers of complex DMIs found through single, double, and triple introgressions (Figure 9): a linear model ( $I_k = bk$ ) and a snowball model ( $I_k = bk^2$ ). Positive bars show the proportions of runs providing stronger support for the snowball model; negative bars show the proportions of runs providing stronger support for the linear model; the proportions of runs providing approximately equal support for both models are not shown. Each proportion is based on  $10^3$  stochastic simulations. Different colors indicate the  $\Delta AIC$  thresholds used in evaluating the level of support for the two models.

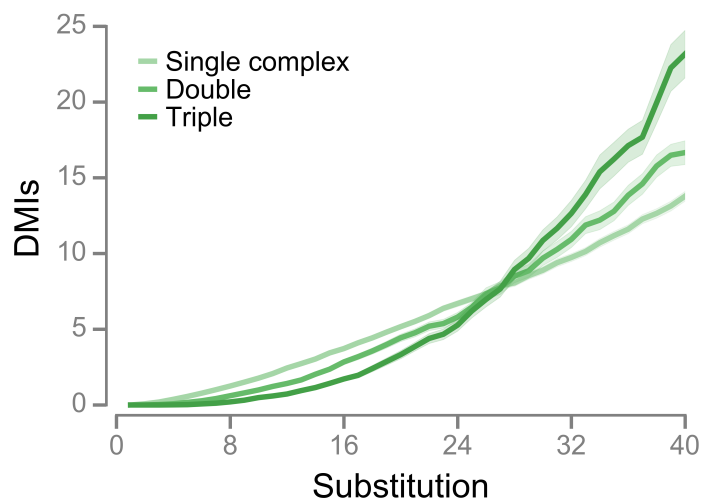

**Figure S6** Allowing sites to undergo multiple substitutions does not affect the pattern of accumulation of DMIs inferred through single, double, and triple introgressions. The results are based on  $10^3$  RNA folding simulations for  $\alpha = 12$ . Shaded regions indicate 95% CIs.

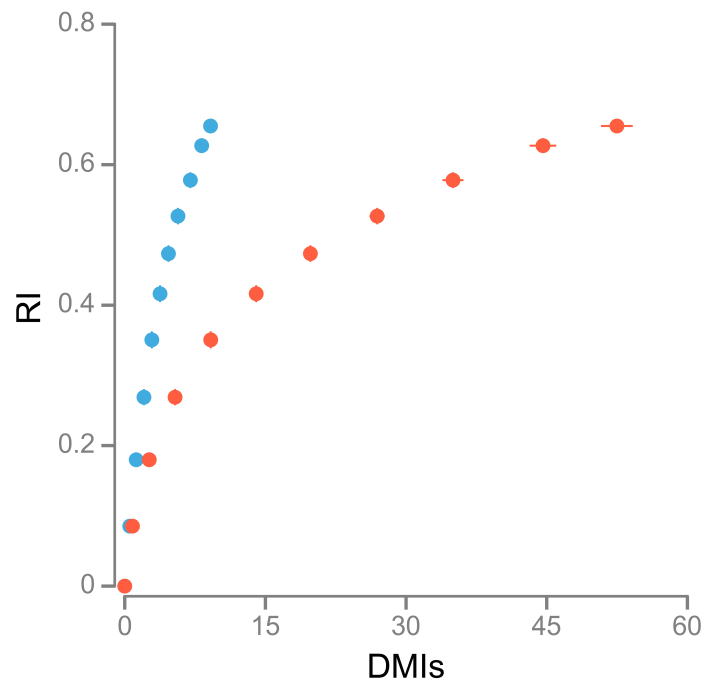

**Figure S7** The numbers of simple (blue) and complex DMIs (red) are not linearly related to RI. Values are means of  $10^3$  simulations for  $k = 0, 4, 8, \dots, 40$ . Error bars are 95% CIs.



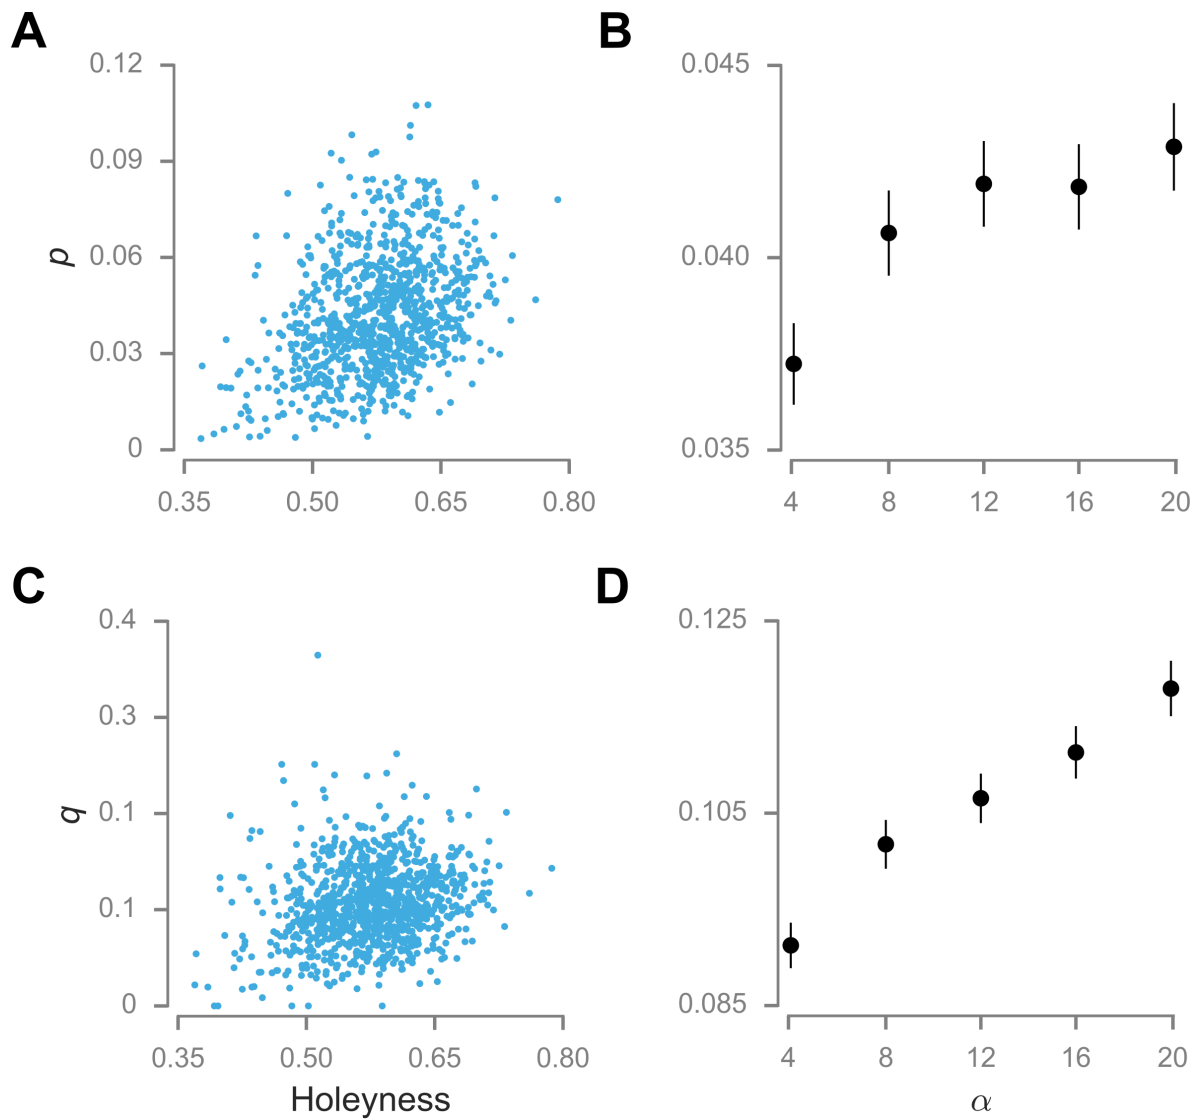

**Figure S8** The fitness landscape influences the parameters of the melting snowball model. (A, C) Both parameters are positively related to the local holeyness of the fitness landscape. Values are individual estimates of  $p$  and  $q$  for each of  $10^3$  RNA folding simulations for  $\alpha = 12$ . (B, D) Both parameters are positively related to  $\alpha$ . Values are means of  $10^3$  RNA folding simulations for each value of  $\alpha$ . Error bars are 95% CIs.

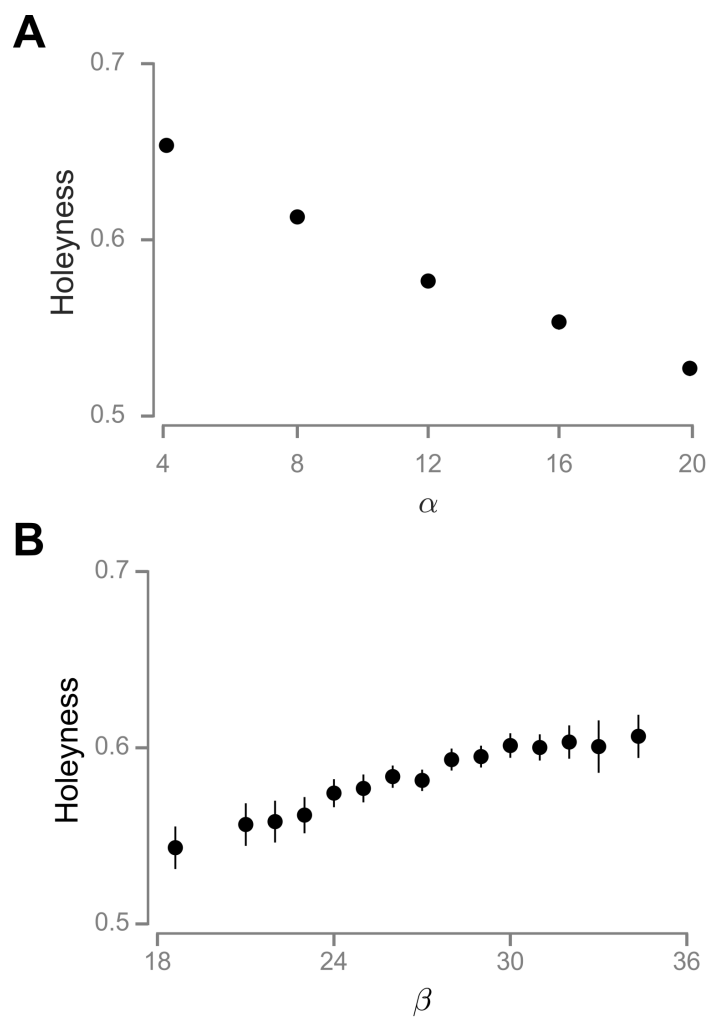

**Figure S9** Holeytness decreases with the value of  $\alpha$  (A) and increases with the number of base pairs,  $\beta$ , in the reference sequence (B). (A) Values are means of  $10^3$  RNA folding simulations for each value of  $\alpha$ . (B) The holeyness data from the  $5 \times 10^3$  simulations used in (A) were grouped by individual values of  $\beta$ . We pooled estimates for  $\beta \leq 20$  and for  $\beta \geq 34$ . The resulting  $\beta$  groups have sample sizes ranging from 120 to 581. Error bars are 95% CIs. The error bars in (A) are covered by the points.

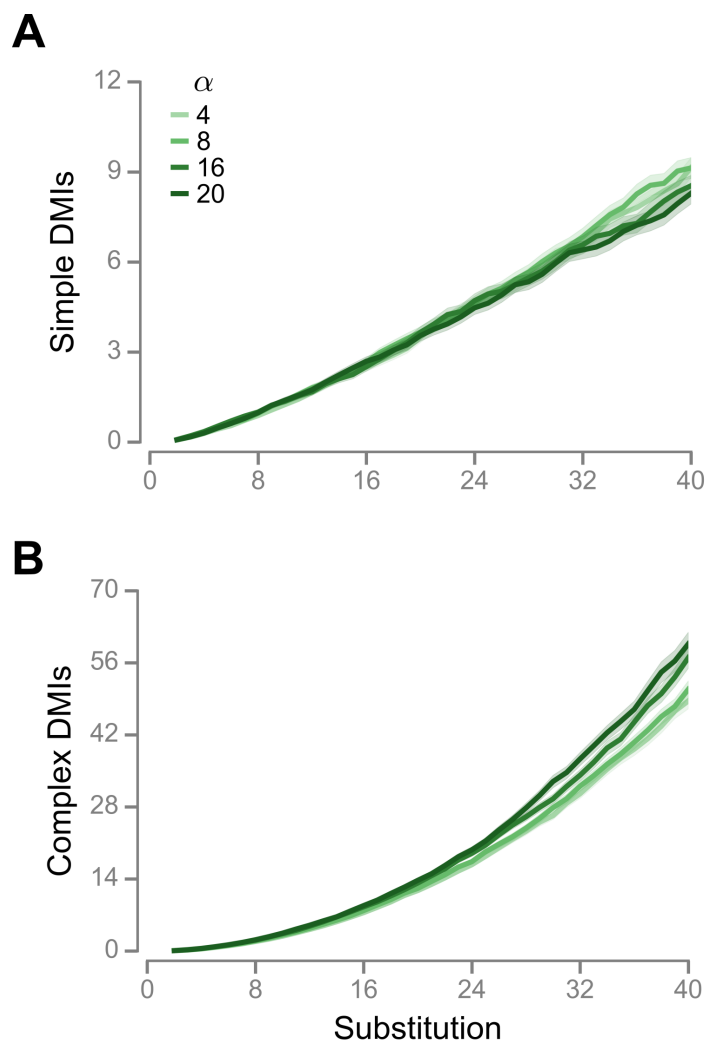

**Figure S10** Simple DMIs accumulate more slowly (A) and complex DMIs accumulate faster (B) as  $\alpha$  increases. The number of complex DMIs was calculated as in Figure 9B. Values are means of  $10^3$  RNA folding simulations for each value of  $\alpha$ . Shaded regions indicate 95% CIs.

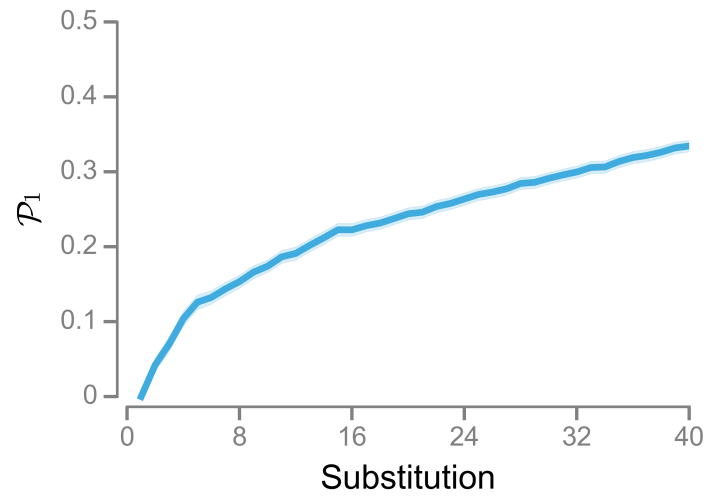

**Figure S11** Evolution of the proportion of single introgressions involved in a DMI,  $\mathcal{P}_1$ , as populations diverge in the RNA folding model. Values are means of  $10^3$  stochastic simulations. Shaded region indicates 95% CIs.

**Table S1 Properties of the  $10^3$  ancestors used in the simulations with  $\alpha = 12$** 

| Property                                       | Mean   | (Standard Deviation) |
|------------------------------------------------|--------|----------------------|
| <i>Sequence</i>                                |        |                      |
| GC content                                     | 0.49   | (0.05)               |
| Hamming distance from the reference sequence   | 56.16  | (5.30)               |
| <i>Structure</i>                               |        |                      |
| Minimum free energy (kcal mol <sup>-1</sup> )  | -22.56 | (5.70)               |
| Number of base pairs                           | 24.91  | (4.16)               |
| Proportion of inviable single mutants          | 0.57   | (0.11)               |
| Number of potential DMIs per site              | 8.99   | (5.70)               |
| Base pair distance from the reference sequence | 11.29  | (1.03)               |
| <i>Ensemble</i>                                |        |                      |
| Base pair distance between pairs of sequences  | 49.51  | (6.01)               |
